# Supplementary figures and images for: The role of Klotho and sirtuins in sleep-related cardiovascular diseases: a review study
Source: PubMed Central journal article supplement — NPJ Aging. 2024 Oct 2;10(1):43. doi: 10.1038/s41514-024-00165-1 (PMC11447243; doi:10.1038/s41514-024-00165-1), 2024-10-02

# Klotho and sirtuins in sleep-related CVDs

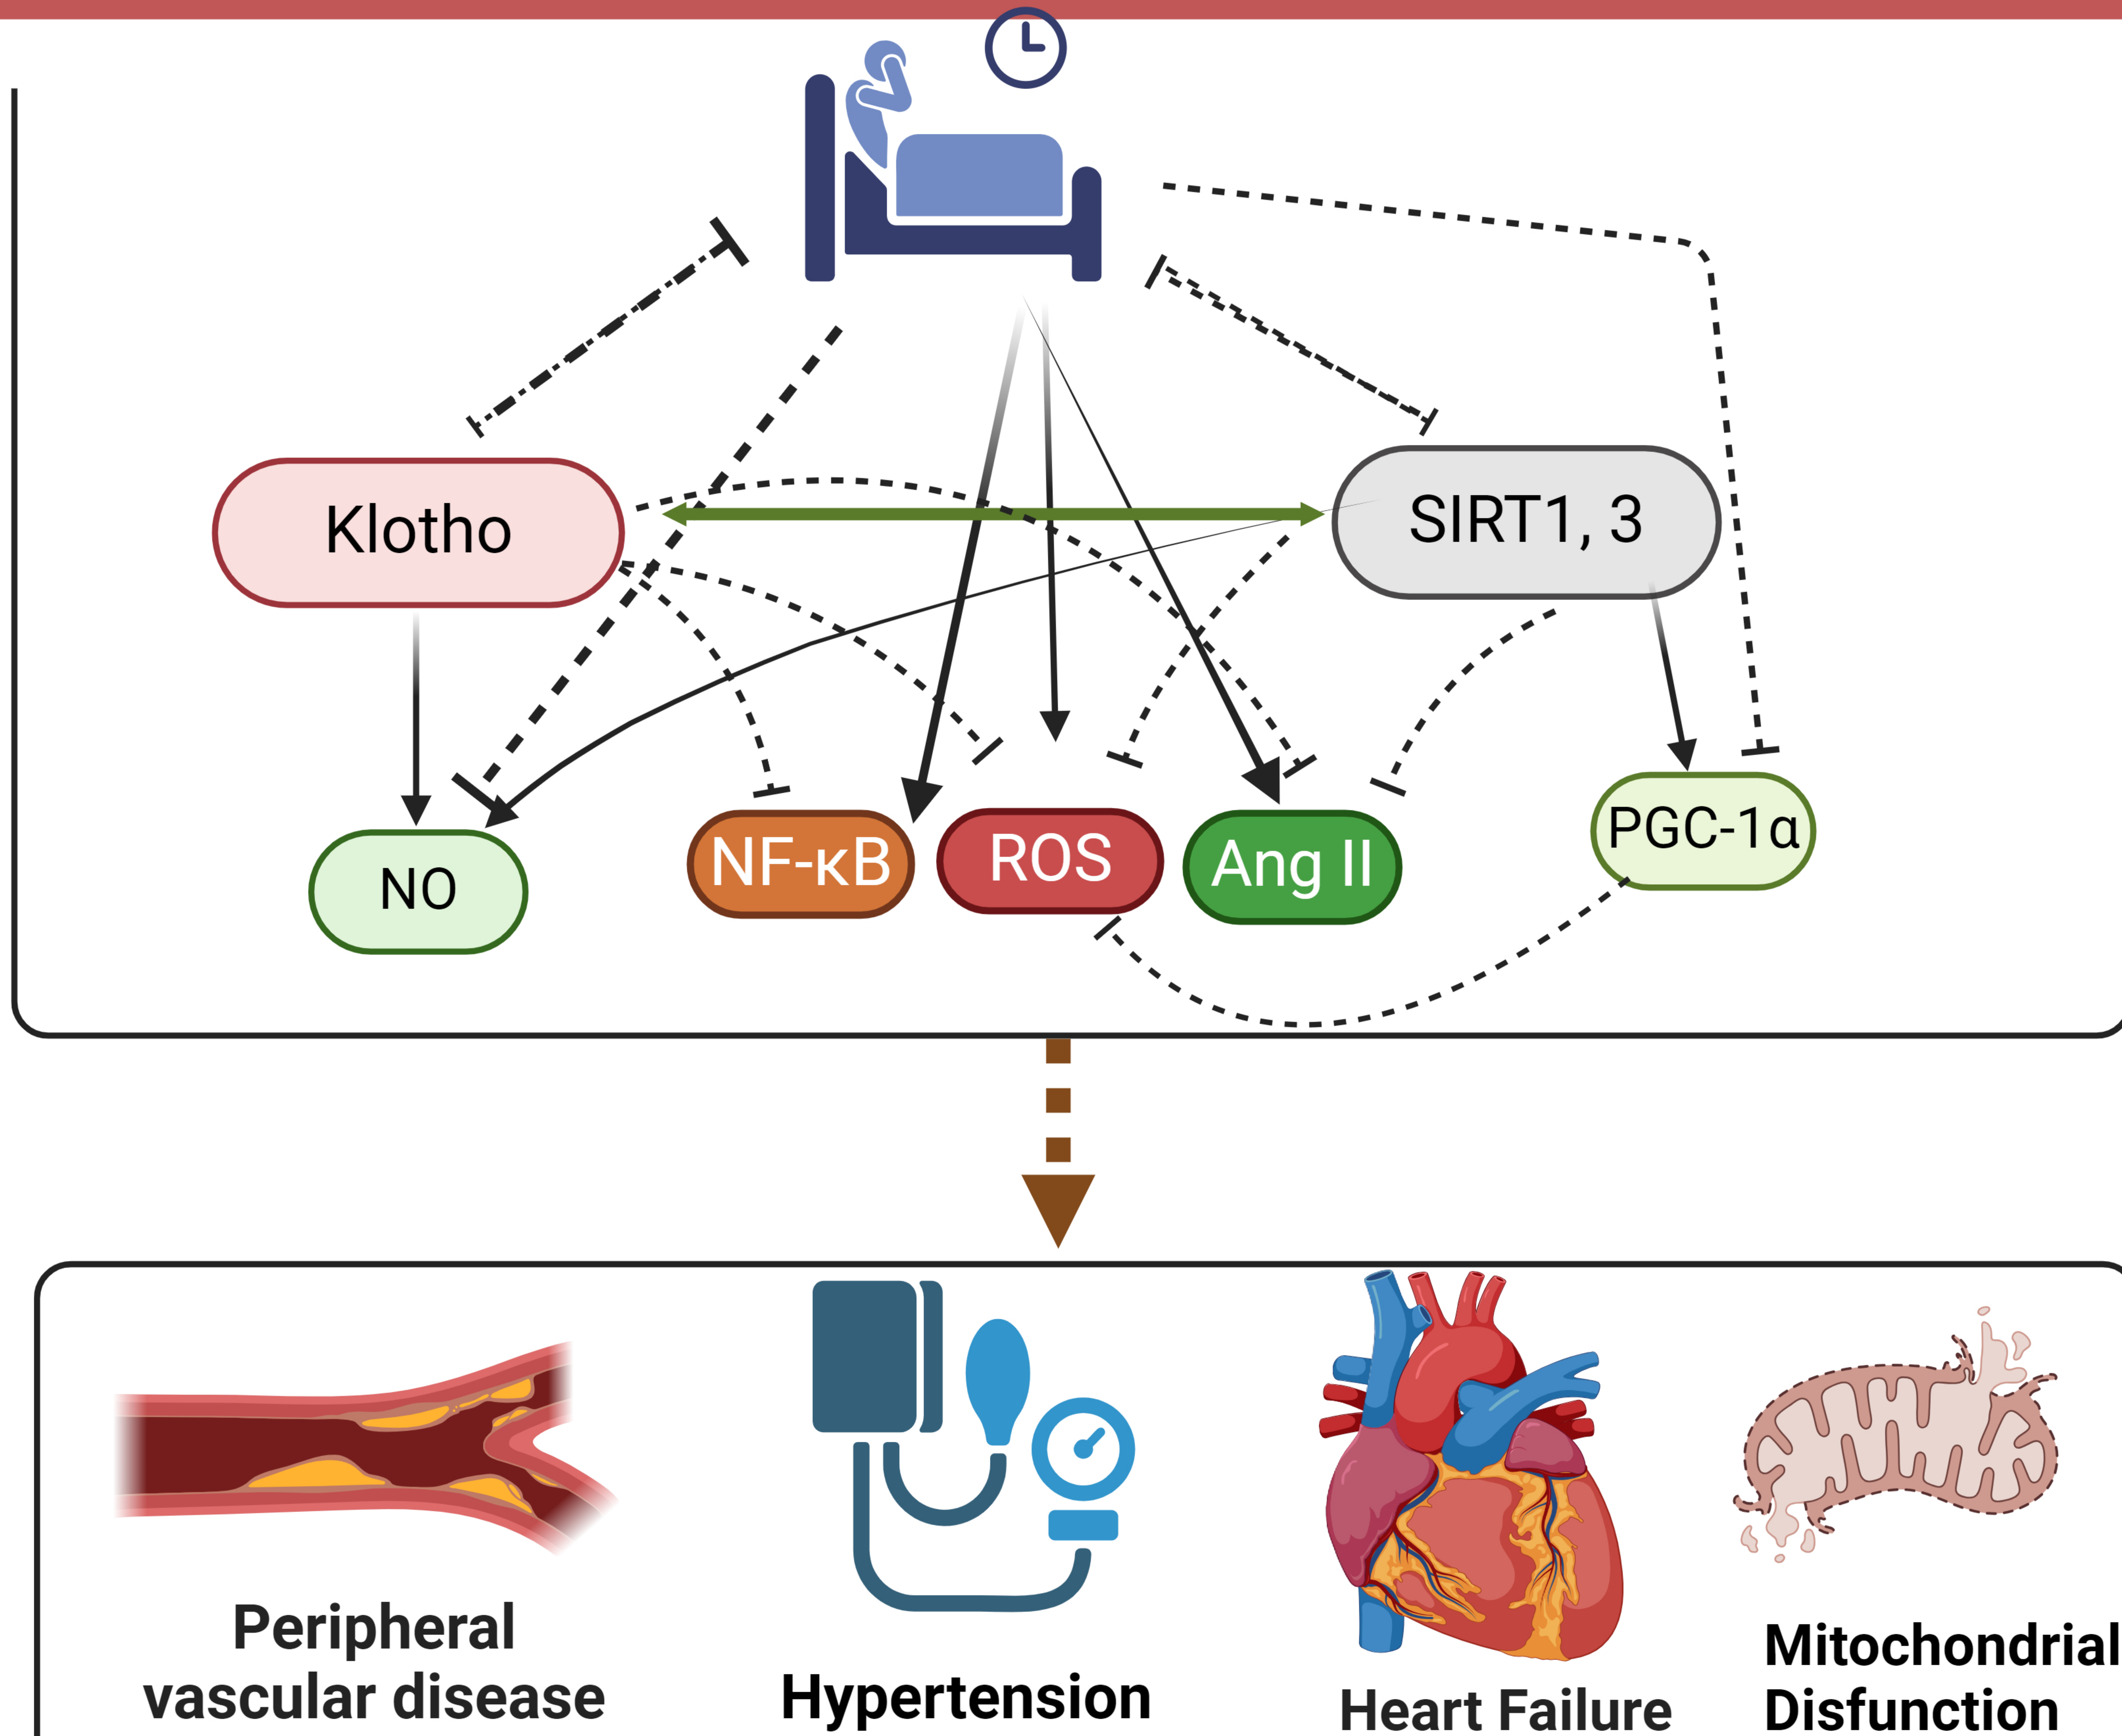

Supplement: 41514_2024_165_MOESM1_ESM.pdf [file 41514_2024_165_MOESM1_ESM.pdf]
